# Supplementary material for: The Changes in Endogenous Metabolites in Hyperlipidemic Rats Treated with Herbal Mixture Containing Lemon, Apple Cider, Garlic, Ginger, and Honey
Source: MDPI journal article supplement (doi:10.3390/nu13103573), 2021-10-12
Supplement: s1 [file s1]

## Supplementary Materials

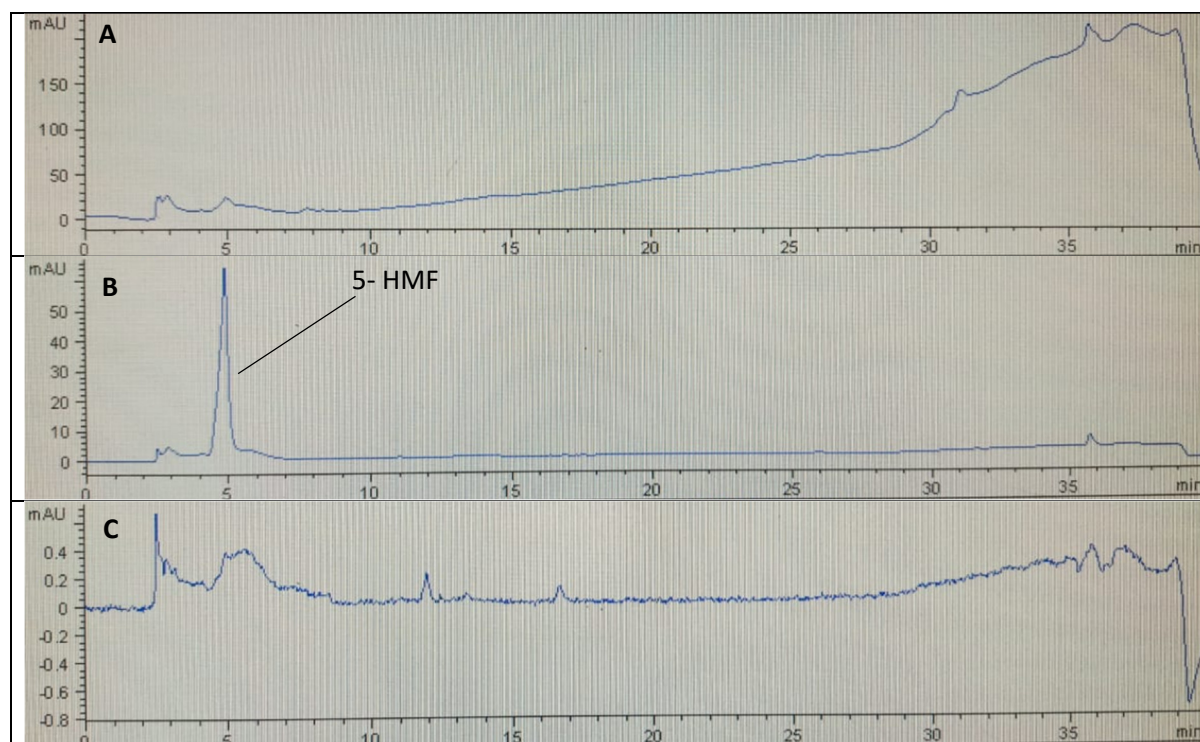

**Figure S1.** Representative chromatogram of acidified PRM at 5 mg/ml. Where A is a chromatogram at 214 nm, B is a chromatogram at 280 nm and C is a chromatogram at 360 nm.

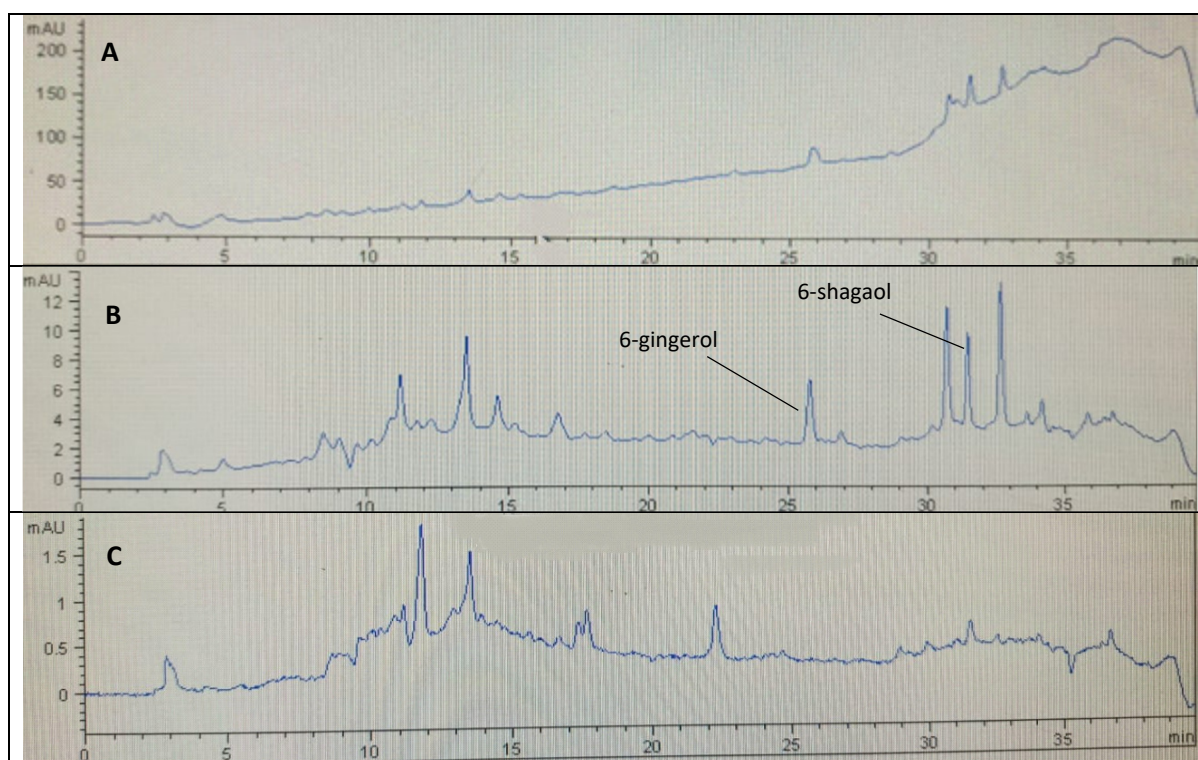

**Figure S2.** Representative chromatogram of PRM at 1 mg/ml after solid phase extraction. Where A is a chromatogram at 214 nm, B is a chromatogram at 280 nm and C is a chromatogram at 360 nm.

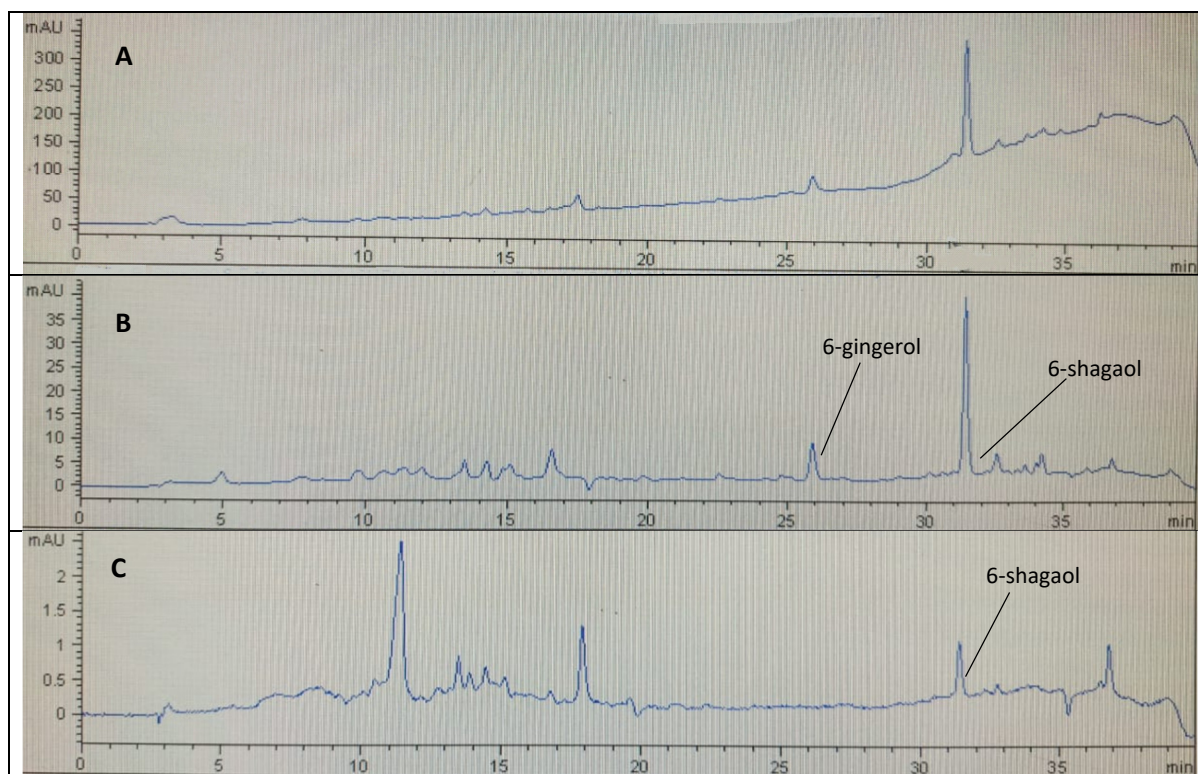

**Figure S3.** Representative chromatogram of PRM ethyl acetate fraction at 12.5 mg/ml. Where A is a chromatogram at 214 nm, B is a chromatogram at 280 nm and C is a chromatogram at 360 nm.

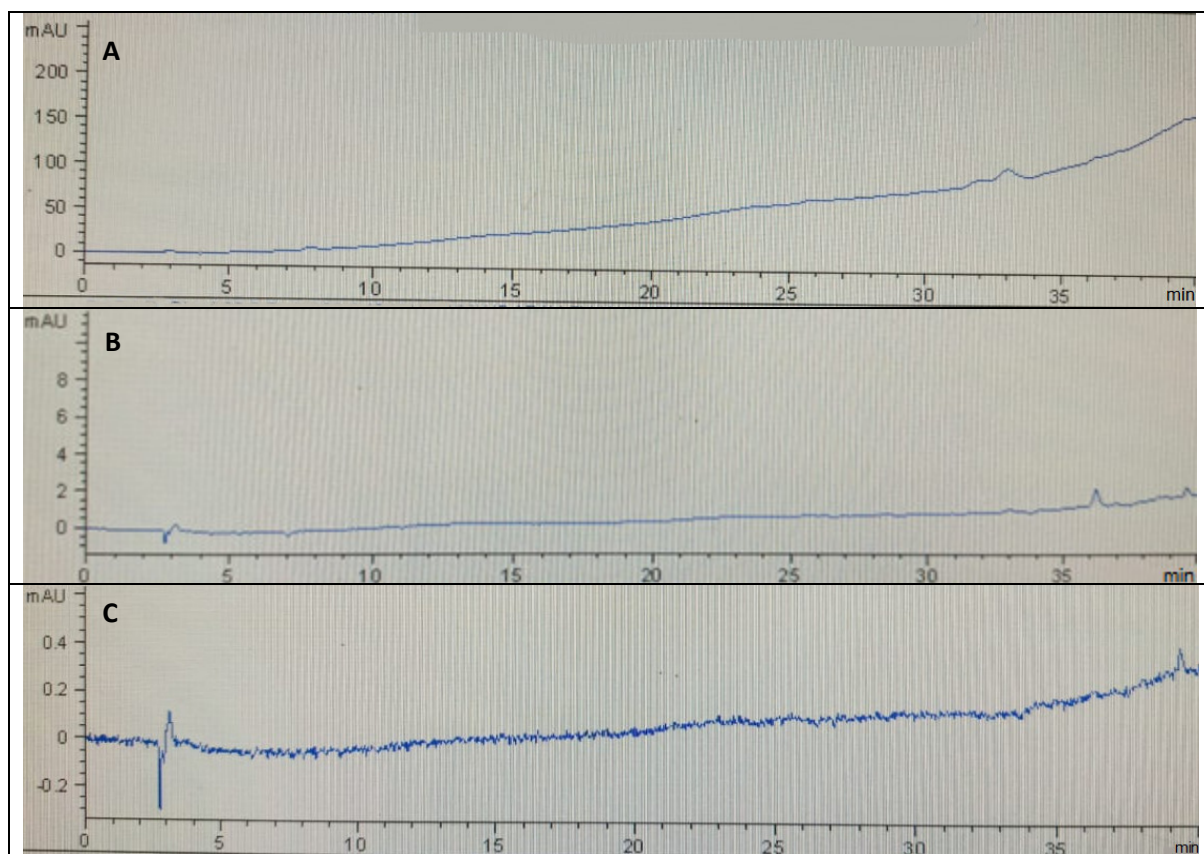

**Figure S4.** Representative chromatogram of PRM aqueous fraction. Where A is a chromatogram at 214 nm, B is a chromatogram at 280 nm and C is a chromatogram at 360 nm.

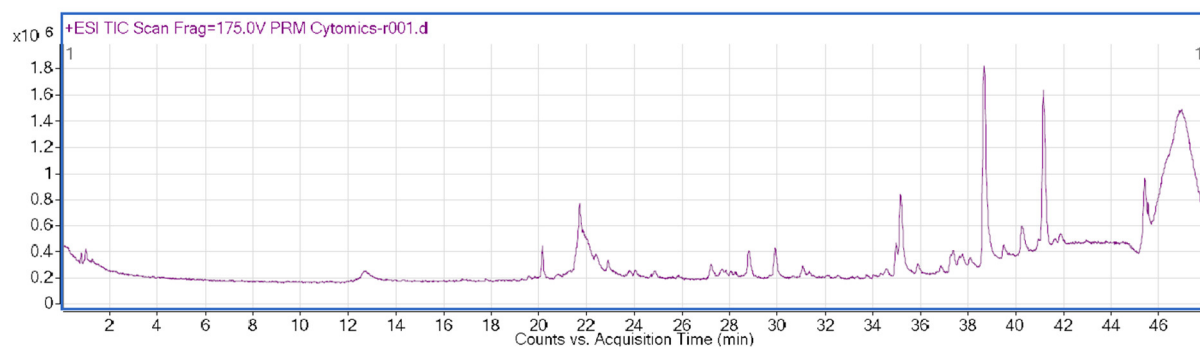

**Figure S5.** Total ion chromatogram (TIC) of PRM after solid phase extraction.



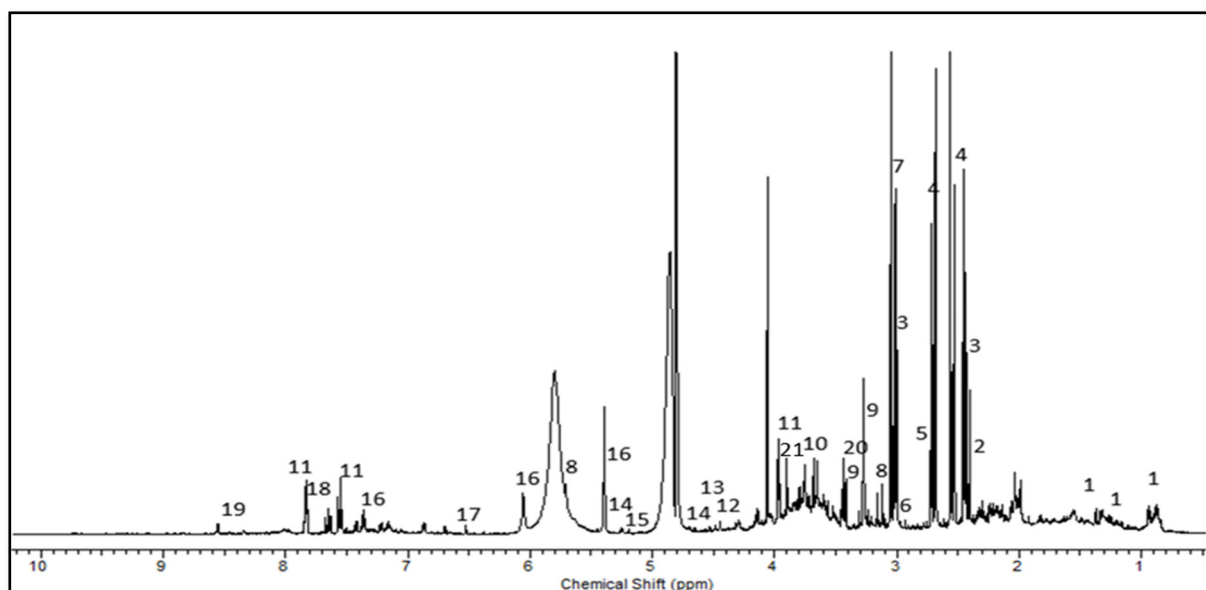

**Figure S6.** Urine spectra representative from 0.5 – 10.2 ppm. Label: 1: Isoleucine, 2: Succinate, 3: 2-Oxoglutarate, 4: Citrate, 5: Dimethylamine (DMA), 6: *N, N* Dimethylglycine (DMG), 7: Creatinine, 8: Cis-aconitate, 9: Taurine, 10: *N*-Phenylacetyl glycine, 11: Hippurate, 12: Trigonelline, 13: 1-Methylnicotinamide (MNA), 14: Glucose, 15: Mannose, 16: Allantoin, 17: Fumarate, 18: Pyridoxine, 19: Formate, 20: Trimethylamine-*N*-oxide (TMAO) and 21: Betaine.

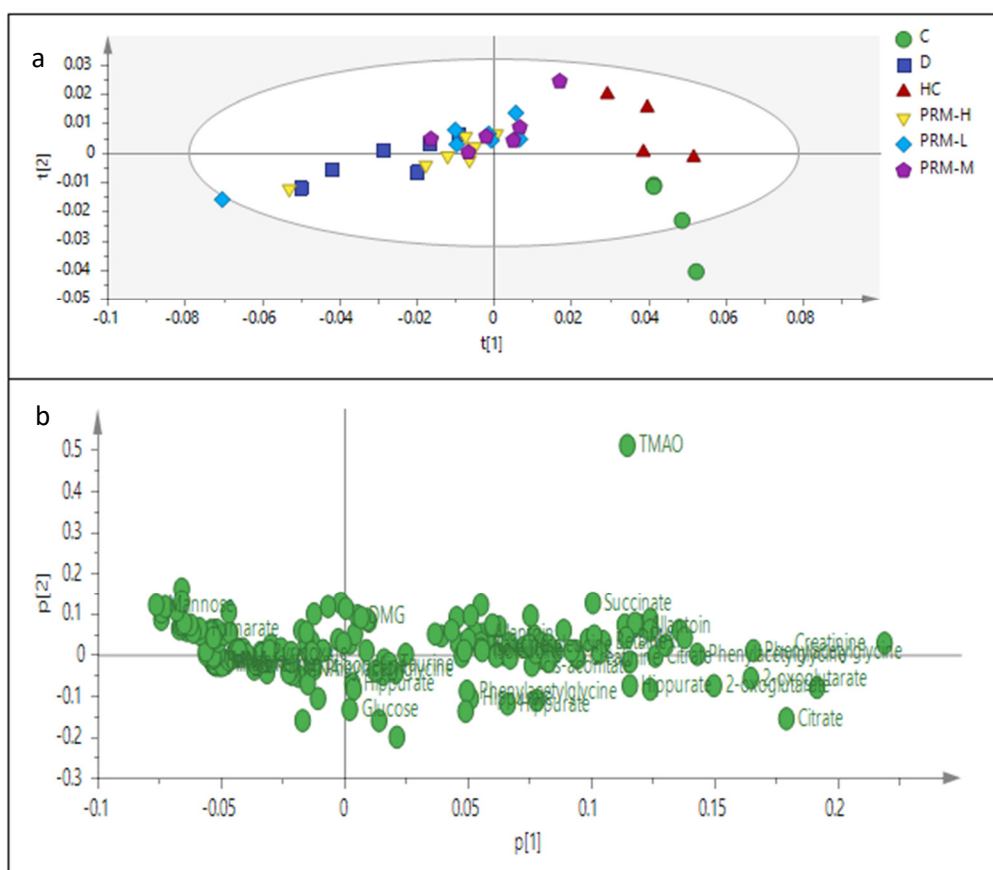

**Figure S7.** Principle component analysis PCA, M1. Score Plot (A) and Loading Scatter Plot (B) obtained using  $^1\text{H}$ -NMR from control (C), simvastatin (D), hyperlipidemia (HC), polyphenol-rich mixture high dose, 500 mg/kg (PRM-H), polyphenol-rich mixture medium dose, 250 mg/kg (PRM-M) and polyphenol-rich mixture low dose, 150 mg/kg (PRM-L).

**Table S1.** Tentative compounds in PRM after solid phase extraction.

| No | RT              | Mass     | Tentative Compound                      | Class                            |
|----|-----------------|----------|-----------------------------------------|----------------------------------|
| 1  | 20.09           | 273.2663 | C16 Sphinganine                         | Organonitrogen compound          |
| 2  | 34.03           | 255.2561 | Palmitic amide                          | Fatty acid                       |
| 3  | 29.90           | 278.1624 | Leu Phe                                 | Amino acid                       |
| 4  | 23.75           | 294.1822 | Gingerol                                | Phenolic compound                |
| 5  | 34.57,<br>35.16 | 330.2784 | 1-Monopalmitin                          | Fatty acid                       |
| 6  | 35.16           | 312.2675 | 10-oxo-nonadecanoic acid                | Fatty acid                       |
| 7  | 35.16           | 256.2402 | 2-propyl-tridecanoic acid               | Fatty acid                       |
| 8  | 27.63           | 234.1614 | Oxysolavetivone                         | Prenol lipids (sesquiterpenoids) |
| 9  | 34.57           | 312.2664 | 10-oxo-nonadecanoic acid                | Fatty acid                       |
| 10 | 19.80           | 213.0815 | 2-(4-Methyl-5-thiazolyl)ethyl butanoate | Azole (Thiazoles)                |
| 11 | 33.12           | 545.4798 | 35-aminobacteriohopane-32,33,34-triol   | Triterpenoids (Hopanoids)        |
| 12 | 24.79           | 652.4469 | PA(P-16:0/18:4(6Z,9Z,12Z,15Z))          | Phospholipids (Plasmalogen)      |
| 13 | 21.64           | 386.1706 | Porson                                  | Diarylheptanoids (Biphenyls)     |
| 14 | 24.01           | 414.2023 | Armillaripin                            | Prenol lipids (Sesquiterpenoids) |
| 15 | 28.74           | 576.4072 | LysoPC(22:2(13Z,16Z))                   | Glycerophospholipids             |
| 16 | 31.06           | 482.3083 | 26-hydroxycholesterol 3-sulfate         | Steroids and steroid derivatives |



**Table S2.** List of pathways involved using qualitative MetaboAnalyst 4.0\*

| Rank                                    |                                             | Total | Expected | Hits | %<br>Found | Raw <i>p</i>          | Impact |
|-----------------------------------------|---------------------------------------------|-------|----------|------|------------|-----------------------|--------|
| (A) Carbohydrate Metabolism             |                                             |       |          |      |            |                       |        |
| 7                                       | Citrate cycle (TCA cycle)                   | 20    | 0.25     | 5    | 5.00       | 6.61x10 <sup>-7</sup> | 0.26   |
| 6                                       | Fructose and mannose metabolism             | 18    | 0.23     | 1    | 5.56       | 0.17                  | 0      |
| 8                                       | Pyruvate metabolism                         | 22    | 0.28     | 1    | 4.55       | 0.20                  | 0      |
| 10                                      | Galactose metabolism                        | 27    | 0.34     | 1    | 3.70       | 0.24                  | 0      |
| 12                                      | Glyoxylate and dicarboxylate metabolism     | 32    | 0.40     | 3    | 3.13       | 3.32x10 <sup>-3</sup> | 0.06   |
| 14                                      | Amino sugar and nucleotide sugar metabolism | 37    | 0.47     | 1    | 2.70       | 0.31                  | 0      |
| (B) Amino acid metabolism               |                                             |       |          |      |            |                       |        |
| 1                                       | D-Glutamine and D-glutamate metabolism      | 6     | 0.08     | 1    | 16.67      | 5.96x10 <sup>-2</sup> | 0      |
| 2                                       | Valine, leucine and isoleucine biosynthesis | 8     | 0.10     | 1    | 12.50      | 7.70x10 <sup>-2</sup> | 0      |
| 3                                       | Phenylalanine metabolism                    | 12    | 0.15     | 2    | 8.33       | 5.75x10 <sup>-3</sup> | 0      |
| 4                                       | Arginine biosynthesis                       | 14    | 0.18     | 2    | 7.14       | 7.84x10 <sup>-3</sup> | 0      |
| 11                                      | Alanine, aspartate and glutamate metabolism | 28    | 0.35     | 4    | 3.57       | 1.12x10 <sup>-4</sup> | 0.05   |
| 13                                      | Glycine, serine and threonine metabolism    | 34    | 0.43     | 2    | 2.94       | 0.29                  | 0.11   |
| 15                                      | Valine, leucine and isoleucine degradation  | 40    | 0.50     | 1    | 2.50       | 0.33                  | 0      |
| 16                                      | Tyrosine metabolism                         | 42    | 0.53     | 1    | 2.38       | 0.35                  | 0.02   |
| (C) Propanoate and Butanoate metabolism |                                             |       |          |      |            |                       |        |
| 5                                       | Butanoate metabolism                        | 15    | 0.19     | 2    | 6.67       | 8.99x10 <sup>-3</sup> | 0      |
| 9                                       | Propanoate metabolism                       | 23    | 0.29     | 1    | 4.35       | 0.21                  | 0      |
| (C) Translation                         |                                             |       |          |      |            |                       |        |
| 17                                      | Aminoacyl-tRNA biosynthesis                 | 48    | 0.60     | 1    | 2.08       | 0.39                  | 0      |

\* The rank of each pathway was calculated based on the percentage of compounds found in each pathway (calculating hits of metabolites over the total number of metabolites). The number of expected metabolites was analyzed using hypergeometric testing to calculate the number of compounds expected to be in each pathway by chance alone. Raw *p* was calculated based on the number of hits and the total number of compounds in the pathway. The pathway impact represents the metabolite importance based on their position in the pathway, which determines by using relative betweenness centrality pathway topology analysis.
